# Supplementary material
Source: publisher figshare collection journal article supplement (https://plos.figshare.com/articles/dataset/_/7536065)
Supplement: Supplementary file [file 1]

## SERUM RAW DATA

### ASC Serum

| Control | 1st      | 2nd      | 4th      | 6th      |
|---------|----------|----------|----------|----------|
| 166.422 | 515.474  | 571.262  | 784.492  | 633.406  |
| 359.219 | 809.502  | 774.894  | 872.346  | 567.095  |
| 331.030 | 289.049  | 276.968  | 262.031  | 605.812  |
| 152.194 | 395.333  | 243.882  | 347.862  | 634.469  |
| 250.470 | 199.004  | 312.580  | 646.659  | 893.074  |
| 273.621 | 138.527  | 309.768  | 400.377  | 154.626  |
| 216.652 | 210.476  | 465.337  | 626.330  | 1070.857 |
| 272.456 | 171.112  | 288.089  | 647.329  | 523.192  |
| 204.526 | 234.834  | 260.629  | 154.042  | 839.426  |
| 350.174 | 771.691  | 385.558  | 621.237  | 466.500  |
| 132.228 | 1006.319 | 769.957  | 1016.983 | 1059.773 |
| 143.440 | 900.333  | 581.385  | 679.974  | 892.199  |
| 297.539 | 1719.545 | 1646.571 | 234.110  | 215.866  |
| 219.284 | 312.122  | 313.869  | 753.431  |          |
| 243.639 | 1054.776 | 726.874  | 1104.345 |          |
| 250.541 | 997.525  | 840.706  | 246.274  |          |
| 302.363 | 1485.805 | 152.318  | 1132.170 |          |
| 226.785 | 302.821  | 969.973  | 589.010  |          |
| 272.186 | 1392.648 | 1315.083 | 409.038  |          |
| 233.228 | 963.914  | 207.074  | 506.148  |          |
| 132.603 |          | 401.481  |          |          |
| 444.319 |          |          |          |          |
| 145.821 |          |          |          |          |
| 141.930 |          |          |          |          |
| 105.624 |          |          |          |          |
| 151.473 |          |          |          |          |
| 135.672 |          |          |          |          |
| 146.659 |          |          |          |          |
| 161.523 |          |          |          |          |
| 186.155 |          |          |          |          |
| 133.385 |          |          |          |          |
| 135.247 |          |          |          |          |
| 136.384 |          |          |          |          |
| 395.447 |          |          |          |          |
| 135.859 |          |          |          |          |
| 106.029 |          |          |          |          |
| 135.105 |          |          |          |          |
| 320.841 |          |          |          |          |
| 269.530 |          |          |          |          |
| 109.826 |          |          |          |          |

230.161  
249.906  
283.705  
182.408  
185.199  
322.904  
264.572  
298.507  
209.917  
289.940  
171.779  
303.014  
282.175  
151.356  
305.075  
351.962  
272.979  
211.962  
232.009  
177.081  
437.708  
184.625  
244.354  
191.421  
288.621  
398.377  
199.762  
252.485  
181.703  
330.935  
190.824  
210.148  
170.652  
458.290  
197.636  
196.394  
196.853  
436.778  
385.048  
354.182  
231.457  
315.760  
250.861  
252.414

172.535  
 149.351  
 192.292  
 382.388  
 184.099  
 233.735  
 402.492  
 216.962  
 221.490  
 227.473  
 326.491  
 245.108  
 156.376  
 148.367  
 262.040  
 143.170  
 174.188  
 242.634  
 169.648  
 259.639  
 180.001  
 114.277  
 186.943  
 290.913  
 256.004  
 325.877  
 159.983  
 193.932  
 381.314  
 284.047  
 258.402

**Caspase-1 Serum**

| <b>Control</b> | <b>1st</b> | <b>2nd</b> | <b>4th</b> | <b>6th</b> |
|----------------|------------|------------|------------|------------|
| 0.952          | 2.052      | 3.328      | 4.649      | 3.375      |
| 1.016          | 1.544      | 2.522      | 3.455      | 2.025      |
| 1.399          | 1.478      | 1.945      | 2.583      | 6.761      |
| 1.080          | 2.960      | 1.588      | 1.836      | 4.211      |
| 1.277          | 0.970      | 1.540      | 3.989      | 5.722      |
| 1.869          | 1.733      | 2.119      | 2.731      | 1.194      |
| 1.522          | 0.918      | 3.339      | 5.130      | 9.843      |
| 2.703          | 4.818      | 2.062      | 5.148      | 3.772      |
| 1.102          | 7.260      | 5.962      | 3.904      | 4.301      |
|                | 7.985      | 2.422      | 5.165      | 3.656      |

|        |       |       |       |
|--------|-------|-------|-------|
| 14.771 | 2.266 | 2.570 | 4.508 |
| 2.567  | 2.637 | 2.016 | 4.565 |
| 14.031 | 4.123 | 4.065 | 1.780 |
| 14.411 | 1.588 | 2.892 |       |
| 1.158  | 6.516 | 8.889 |       |
| 20.554 | 1.486 | 6.015 |       |
| 17.892 | 4.639 | 4.145 |       |
| 5.647  |       | 4.770 |       |

# **IL-18 Serum**

| <b>Control</b> | <b>1st</b> | <b>2nd</b> | <b>4th</b> | <b>6th</b> |
|----------------|------------|------------|------------|------------|
| 170.351        | 318.533    | 221.660    | 260.689    | 283.761    |
| 160.553        | 104.232    | 95.383     | 123.252    | 94.196     |
| 121.050        | 233.355    | 259.711    | 335.670    | 396.293    |
| 214.514        | 47.804     | 46.586     | 130.532    | 116.643    |
| 188.606        | 104.986    | 228.044    | 213.299    | 316.114    |
| 153.321        | 43.723     | 119.592    | 145.726    | 53.049     |
| 146.399        | 119.067    | 237.482    | 227.538    | 347.281    |
| 288.921        | 77.442     | 224.073    | 210.336    | 185.591    |
| 248.157        | 130.457    | 146.893    | 70.752     | 307.239    |
| 169.554        | 167.342    | 120.714    | 168.783    | 142.393    |
| 239.034        | 304.151    | 384.541    | 293.650    | 587.682    |
| 366.142        | 213.145    | 171.978    | 193.186    | 205.570    |
| 168.911        | 252.959    | 347.315    | 377.697    | 193.854    |
| 95.077         | 160.849    | 192.685    | 212.354    |            |
| 362.969        | 178.019    | 215.263    | 230.724    |            |
| 160.703        | 364.816    | 390.554    | 207.186    |            |
| 174.991        | 190.116    | 189.629    | 297.998    |            |
| 127.225        | 111.408    | 284.101    | 88.031     |            |
| 299.546        | 125.183    | 233.669    | 164.056    |            |
| 298.910        | 306.775    | 246.165    | 423.688    |            |
| 69.956         | 273.831    | 369.261    |            |            |
| 120.756        |            |            |            |            |
| 112.281        |            |            |            |            |
| 337.715        |            |            |            |            |
| 128.537        |            |            |            |            |
| 214.499        |            |            |            |            |
| 126.888        |            |            |            |            |
| 133.854        |            |            |            |            |
| 117.710        |            |            |            |            |
| 133.938        |            |            |            |            |
| 119.891        |            |            |            |            |

112.044  
172.644  
177.269  
109.077  
190.010  
88.034  
339.309  
199.045  
79.359  
301.794  
201.729  
220.095  
176.761  
414.275  
365.247  
250.060  
422.656  
154.709  
340.058  
401.193  
197.874  
172.644  
296.602  
71.083  
259.665  
161.044  
264.877  
181.314  
267.299  
254.793  
168.910  
215.852  
322.212  
352.547  
270.429  
214.651  
137.754  
157.465  
225.436  
331.824  
221.249  
182.040  
230.803  
141.579

193.753  
228.834  
249.756  
196.698  
249.668  
216.769  
227.780  
178.831  
280.246  
260.112  
326.348  
127.739  
277.242  
198.420  
81.272  
40.500  
304.396  
162.690  
384.035  
180.761  
125.331  
213.080  
195.529  
178.879  
213.791  
242.073  
152.610  
101.294  
306.446  
200.099  
301.409  
117.147  
155.932  
212.702  
240.876  
193.350  
196.446  
275.584  
154.959  
228.121  
202.907  
287.210  
343.337  
415.221

**IL-1 $\beta$  Serum**

| <b>Control</b> | <b>1st</b> | <b>2nd</b> | <b>4th</b> | <b>6th</b> |
|----------------|------------|------------|------------|------------|
| 1.128          | 0.431      | 3.291      | 0.625      | 0.400      |
| 1.770          | 0.760      | 0.846      | 0.994      | 1.054      |
| 0.484          | 0.709      | 0.526      | 0.592      | 1.622      |
| 0.620          | 0.805      | 0.913      | 0.457      | 0.583      |
| 0.453          | 0.410      | 2.360      | 1.507      | 0.434      |
| 0.444          | 0.849      | 2.452      | 0.754      | 0.817      |
| 0.413          | 1.315      | 0.939      | 1.606      |            |
| 1.629          | 0.802      | 4.674      | 0.950      |            |
| 1.305          | 0.427      | 0.715      | 0.647      |            |
| 1.135          | 0.714      |            | 0.540      |            |
| 1.607          |            |            | 0.675      |            |
| 1.867          |            |            |            |            |
| 2.028          |            |            |            |            |
| 0.522          |            |            |            |            |
| 3.276          |            |            |            |            |
| 1.021          |            |            |            |            |
| 0.648          |            |            |            |            |
| 0.875          |            |            |            |            |
| 1.747          |            |            |            |            |
| 1.897          |            |            |            |            |
| 0.617          |            |            |            |            |
