# Supplementary material
Source: publisher figshare collection journal article supplement (https://plos.figshare.com/articles/dataset/_/7536065)
Supplement: Supplementary file [file 1]

## FAVORABLE VS UNFAVORABLE

### ASC 1<sup>st</sup> collection

#### **Favorable Unfavorable**

|         |          |
|---------|----------|
| 289.049 | 515.474  |
| 138.527 | 809.502  |
| 234.834 | 395.333  |
| 312.122 | 199.004  |
| 963.914 | 210.476  |
|         | 171.112  |
|         | 771.691  |
|         | 1006.319 |
|         | 900.333  |
|         | 1719.545 |
|         | 1054.776 |
|         | 997.525  |
|         | 1485.805 |
|         | 302.821  |
|         | 1392.648 |
|         | 2513.009 |

### ASC 2<sup>nd</sup> collection

#### **Favorable Unfavorable**

|         |          |
|---------|----------|
| 276.968 | 571.262  |
| 309.768 | 774.894  |
| 260.629 | 243.882  |
| 313.869 | 312.580  |
| 207.074 | 465.337  |
|         | 288.089  |
|         | 385.558  |
|         | 769.957  |
|         | 581.385  |
|         | 1646.571 |
|         | 726.874  |
|         | 840.706  |
|         | 152.318  |
|         | 969.973  |
|         | 1315.083 |
|         | 401.481  |

### ASC 4<sup>th</sup> collection

#### **Favorable Unfavorable**

|         |         |
|---------|---------|
| 262.031 | 784.492 |
| 400.377 | 872.346 |

|         |          |
|---------|----------|
| 154.042 | 347.862  |
| 234.110 | 646.659  |
| 409.038 | 626.330  |
| 506.148 | 647.329  |
|         | 621.237  |
|         | 1016.983 |
|         | 679.974  |
|         | 753.431  |
|         | 1104.345 |
|         | 246.274  |
|         | 1132.170 |
|         | 589.010  |

#### **Caspase-1 1<sup>st</sup> collection**

##### **Favorable Unfavorable**

|        |        |
|--------|--------|
| 1.478  | 2.052  |
| 0.970  | 1.544  |
| 2.567  | 2.960  |
| 17.892 | 1.733  |
|        | 0.918  |
|        | 4.818  |
|        | 7.260  |
|        | 7.985  |
|        | 14.771 |
|        | 14.031 |
|        | 14.411 |
|        | 1.158  |
|        | 20.554 |
|        | 5.647  |

#### **Caspase-1 2<sup>nd</sup> collection**

##### **Favorable Unfavorable**

|       |       |
|-------|-------|
| 1.945 | 3.328 |
| 2.119 | 2.522 |
| 2.637 | 1.588 |
| 1.486 | 1.540 |
|       | 3.339 |
|       | 2.062 |
|       | 5.962 |
|       | 2.422 |
|       | 2.266 |
|       | 4.123 |
|       | 9.434 |

1.588  
6.516  
4.639

**Caspase-1 4<sup>th</sup> collection**

**Favorable Unfavorable**

|       |       |
|-------|-------|
| 2.583 | 4.649 |
| 2.731 | 3.455 |
| 2.016 | 1.836 |
| 4.145 | 3.989 |
|       | 5.130 |
|       | 5.148 |
|       | 3.904 |
|       | 5.165 |
|       | 2.570 |
|       | 4.065 |
|       | 2.892 |
|       | 8.889 |
|       | 6.015 |
|       | 4.770 |

**Serum IL-18 1<sup>st</sup> collection**

**Favorable Unfavorable**

|         |         |
|---------|---------|
| 233.355 | 318.533 |
| 43.723  | 104.232 |
| 130.457 | 47.804  |
| 160.849 | 104.986 |
| 306.775 | 119.067 |
|         | 77.442  |
|         | 167.342 |
|         | 304.151 |
|         | 213.145 |
|         | 252.959 |
|         | 178.019 |
|         | 364.816 |
|         | 190.116 |
|         | 111.408 |
|         | 125.183 |
|         | 273.831 |

**Serum IL-18 2<sup>nd</sup> collection**

**Favorable Unfavorable**

|         |         |
|---------|---------|
| 259.711 | 221.660 |
| 119.592 | 95.383  |

|         |         |
|---------|---------|
| 146.893 | 46.586  |
| 192.685 | 228.044 |
| 246.165 | 237.482 |
|         | 224.073 |
|         | 120.714 |
|         | 384.541 |
|         | 171.978 |
|         | 347.315 |
|         | 215.263 |
|         | 390.554 |
|         | 189.629 |
|         | 284.101 |
|         | 233.669 |
|         | 369.261 |

**Serum IL-18 4<sup>th</sup> collection**

**Favorable Unfavorable**

|         |         |
|---------|---------|
| 335.670 | 260.689 |
| 145.726 | 123.252 |
| 70.752  | 130.532 |
| 212.354 | 213.299 |
| 164.056 | 227.538 |
|         | 210.336 |
|         | 168.783 |
|         | 293.650 |
|         | 193.186 |
|         | 377.697 |
|         | 230.724 |
|         | 612.271 |
|         | 207.186 |
|         | 297.998 |
|         | 88.031  |
|         | 423.688 |
