# Supplementary material
Source: publisher figshare collection journal article supplement (https://plos.figshare.com/articles/dataset/_/7536065)
Supplement: Supplementary file [file 1]

## CSF RAW DATA

### ASC CSF

| <b>Control</b> | <b>1st</b> | <b>2nd</b> | <b>4th</b> | <b>6th</b> |
|----------------|------------|------------|------------|------------|
| 69.363         | 303.430    | 218.119    | 127.923    | 116.442    |
| 43.319         | 396.648    | 226.564    | 619.151    | 599.695    |
| 52.654         | 64.690     | 177.206    | 473.175    | 118.092    |
| 40.637         | 62.767     | 52.413     | 38.678     | 126.946    |
| 42.854         | 98.833     | 44.082     | 481.385    | 90.198     |
| 48.779         | 502.166    | 195.957    | 76.782     | 79.288     |
| 42.571         | 1425.894   | 42.393     | 988.668    | 1062.003   |
| 60.266         | 113.010    | 62.556     | 68.889     | 410.139    |
| 40.626         | 56.335     | 44.651     | 389.402    |            |
| 53.879         | 578.210    | 345.010    | 50.113     |            |
| 44.047         | 1018.515   | 68.063     | 122.328    |            |
| 51.714         | 1539.883   | 94.809     | 1355.021   |            |
| 40.705         | 741.984    | 125.809    | 90.967     |            |
| 47.799         | 93.689     | 162.107    | 186.440    |            |
|                | 111.380    |            |            |            |

### IL-18 CSF

| <b>Control</b> | <b>1st</b> | <b>2nd</b> | <b>4th</b> | <b>6th</b> |
|----------------|------------|------------|------------|------------|
| 1.089          | 7.060      | 7.841      | 3.536      | 3.699      |
| 1.244          | 9.796      | 9.053      | 8.833      | 1.063      |
| 1.365          | 3.917      | 4.026      | 1.573      | 1.751      |
| 1.942          | 2.262      | 2.327      | 1.763      | 2.838      |
| 2.709          | 1.365      | 4.379      | 3.231      | 2.446      |
| 3.723          | 2.734      | 1.517      | 7.304      | 1.996      |
| 2.851          | 10.828     | 2.417      | 1.366      | 1.101      |
| 1.446          | 4.591      | 10.986     | 4.695      | 5.591      |
| 2.105          | 1.810      | 1.482      | 4.101      |            |
| 1.663          | 17.747     | 4.151      | 5.284      |            |
| 2.686          | 26.372     | 2.982      |            |            |
| 3.841          | 22.916     | 3.732      |            |            |
| 1.552          | 19.285     | 5.457      |            |            |
| 2.782          | 3.771      | 4.414      |            |            |
| 2.879          | 3.010      |            |            |            |
| 2.114          |            |            |            |            |
| 1.351          |            |            |            |            |
| 1.878          |            |            |            |            |
| 3.449          |            |            |            |            |
